# Supplementary material for: Oral Mesenchymal Stromal Cells in Systemic Sclerosis: Characterization and Response to a Hyaluronic-Acid-Based Biomaterial
Source: MDPI journal article supplement (doi:10.3390/app11178101), 2021-08-31
Supplement: s1 [file s1]

# Oral Mesenchymal Stromal Cells in Systemic Sclerosis: Characterization and Response to a Hyaluronic-Acid-Based Biomaterial

Alina Stanomir<sup>1</sup>, Carmen Mihaela Mihu<sup>2</sup>, Simona Rednic<sup>3</sup>, Cristina Pamfil<sup>3</sup>, Alexandra Roman<sup>1</sup>, Andrada Soancă<sup>1</sup>, Iulia Cristina Micu<sup>1</sup>, Adriana Elena Bulboacă<sup>4</sup>, Ștefan Ioan Stratul<sup>5</sup>, Aurel Popa-Wagner<sup>6,7</sup> and Eموke Pall<sup>8</sup>

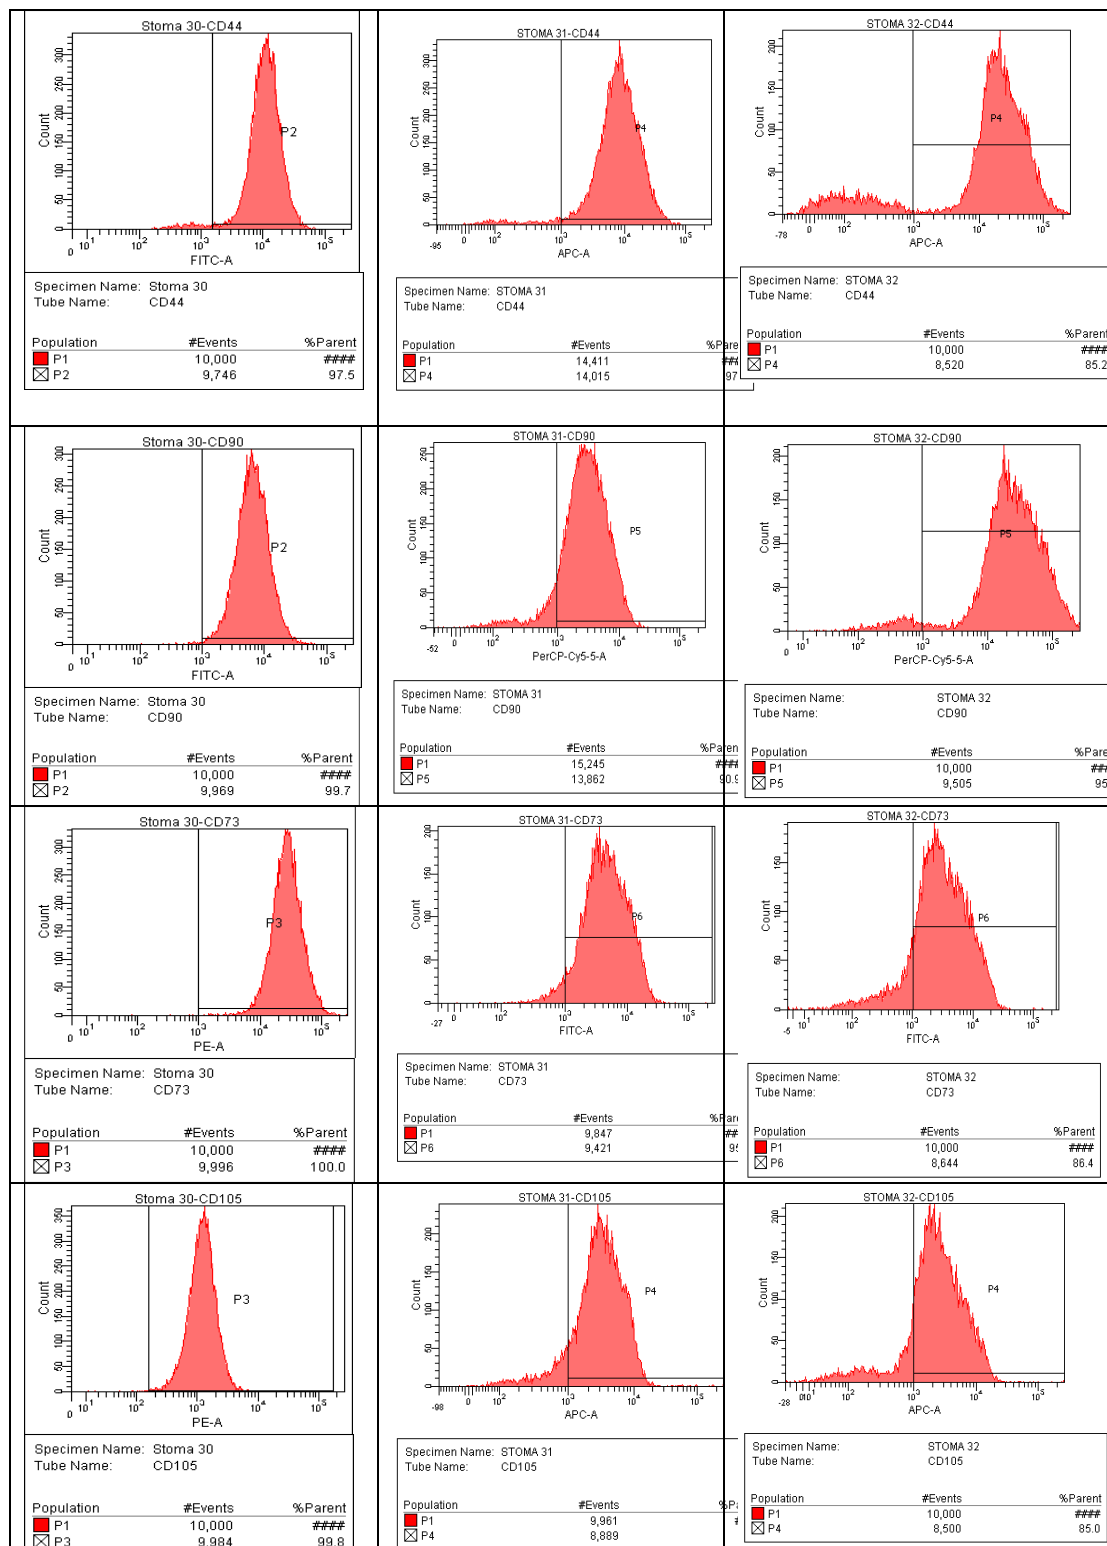

Figure S1. Flow cytometric analysis of MSCs: positive surface markers. Stoma 30=hMSCs; Stoma 31=SScgtMSCs; Stoma 32=SScgtMSCs. MSCs=mesenchymal stromal cells, SSc=systemic sclerosis, h=healthy gingiva, g=gingiva from SSc, gt=granulation tissue from SSc.

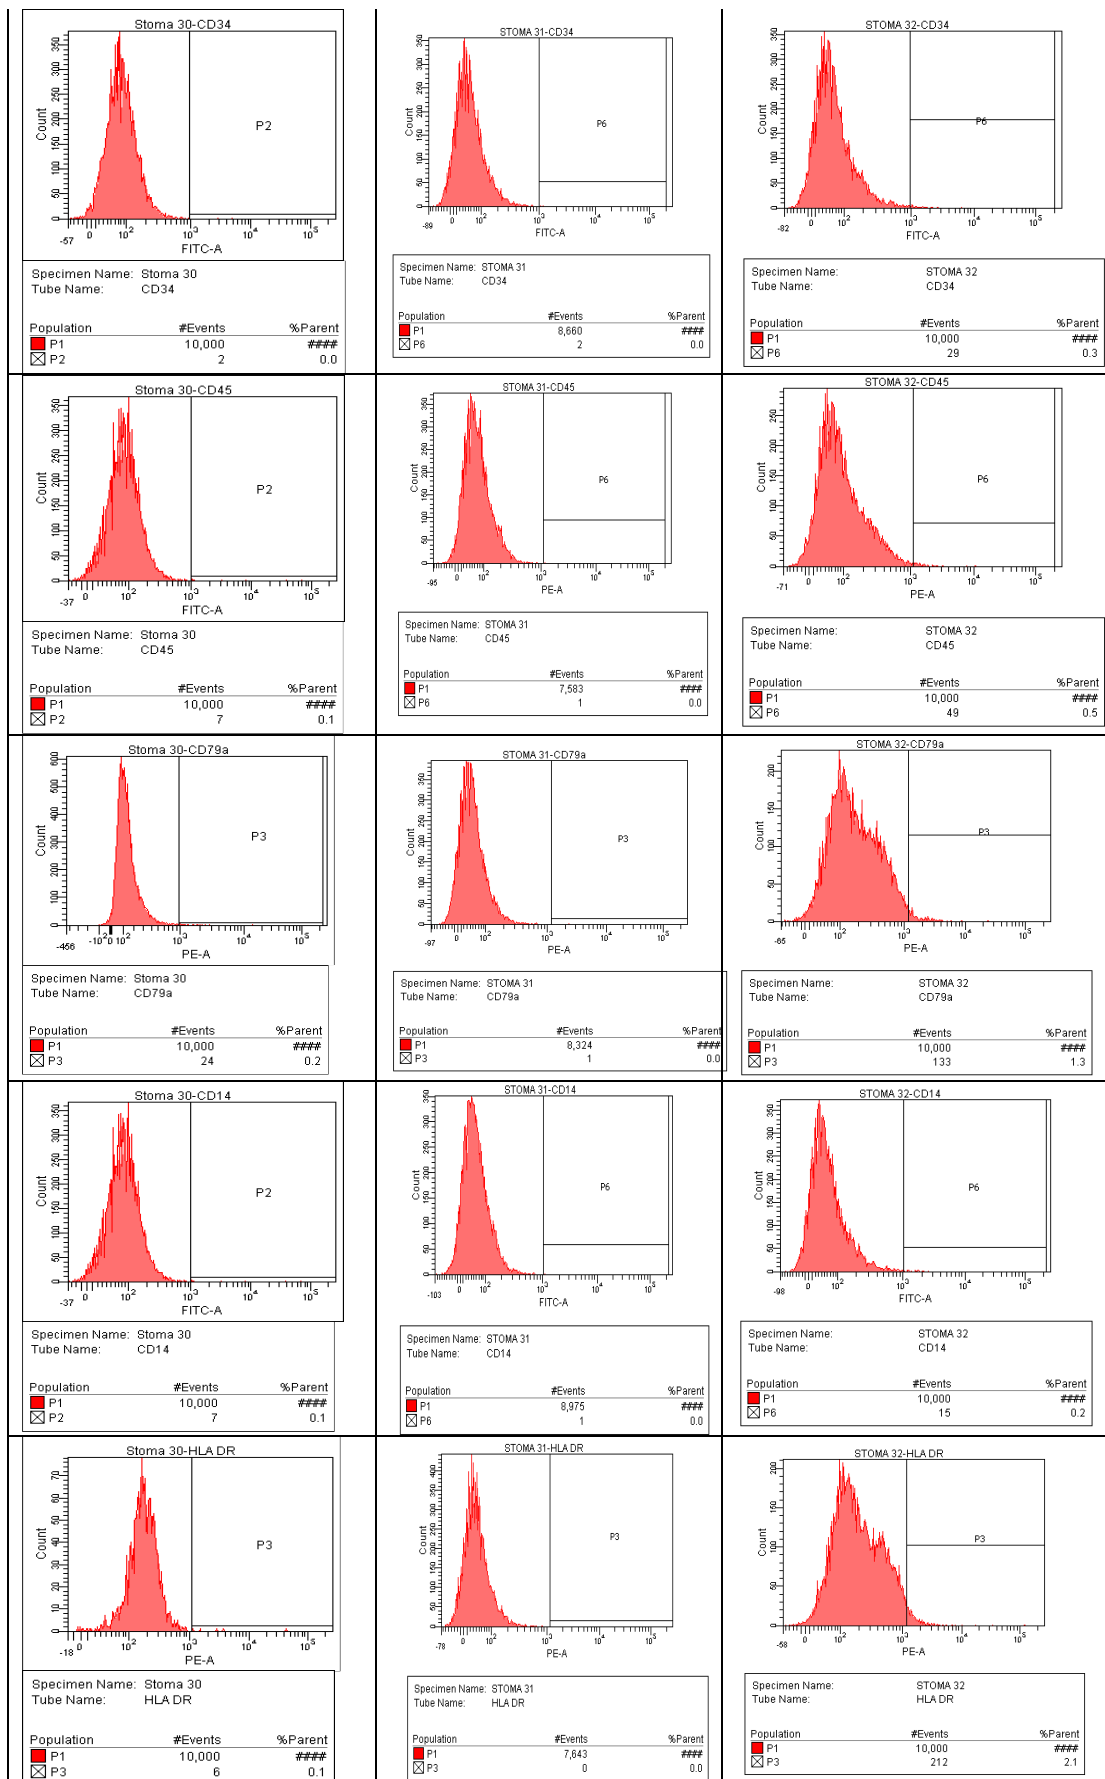

Figure S2. Flow cytometric analysis of MSCs: Negative surface markers. Stoma 30=hMSCs; Stoma 31=SScgtMSCs; Stoma 32=SScgtMSCs. MSCs=mesenchymal stromal cells, SSc= systemic sclerosis, h=healthy gingiva, g=gingiva from SSc, gt=granulation tissue from SSc.
